# Supplementary material
Source: publisher figshare collection journal article supplement (https://tandf.figshare.com/ndownloader/files/14758436)
Supplement: Supplementary file [file 14758436]

## Supplementary data

Table 2. Correlation of migration and clinical outcomes

| 2-year outcome | Subsidence |         | Retroversion |         |
|----------------|------------|---------|--------------|---------|
|                | Rho        | p-value | Rho          | p-value |
| OHS            | -0.19      | 0.2     | -0.09        | 0.6     |
| Pain, rest     | 0.15       | 0.3     | -0.04        | 0.8     |
| Pain, activity | 0.08       | 0.6     | -0.01        | 1.0     |

Table 3. Precision of RSA

|            | Translation (mm) |        |        | Rotation (°) |        |        |
|------------|------------------|--------|--------|--------------|--------|--------|
|            | X-axis           | Y-axis | Z-axis | X-axis       | Y-axis | Z-axis |
| Mean diff. | 0.01             | 0.01   | 0.00   | 0.02         | 0.22   | -0.03  |
| SD diff.   | 0.10             | 0.08   | 0.15   | 0.39         | 1.05   | 0.16   |
| CR ±       | 0.19             | 0.16   | 0.30   | 0.77         | 2.06   | 0.32   |
| LoA, lower | -0.18            | -0.16  | -0.30  | -0.73        | -1.73  | -0.34  |
| upper      | 0.21             | 0.17   | 0.30   | 0.77         | 2.17   | 0.30   |

Mean diff: The systematic difference of RSA.

SD diff: Random variation of RSA.

CR: Coefficient of repeatability ( $SD \times 1.96$ ). Indicates the RSA precision for individual recordings.

LoA: Limits of agreement/prediction interval.

Table 4. Migration and clinical outcome

|                                            | 0 to 1 year            |                        |                      | 0 to 2 years           |                        |                       |                         |                      |
|--------------------------------------------|------------------------|------------------------|----------------------|------------------------|------------------------|-----------------------|-------------------------|----------------------|
|                                            | Hi-Fatigue<br>(n = 25) | Palacos<br>(n = 26)    | p-value <sup>a</sup> | Hi-Fatigue<br>(n = 24) | Palacos<br>(n = 24)    |                       | Difference <sup>b</sup> | p-value <sup>a</sup> |
| Migration (translation), mean (95% CI), mm |                        |                        |                      |                        |                        |                       |                         |                      |
| x-axis                                     | 0.04 (−0.06 to 0.13)   | 0.02 (−0.04 to 0.08)   | 0.7                  | −0.04 (−0.14 to 0.07)  | 0.03 (−0.03 to 0.10)   | −0.70 (−0.20 to 0.06) |                         | 0.4                  |
| y-axis                                     | −0.91 (−1.02 to −0.81) | −1.03 (−1.15 to −0.91) | 0.2                  | −1.12 (−1.29 to −0.96) | −1.19 (−1.34 to −1.03) | 0.06 (−0.17 to 0.30)  |                         | 0.7                  |
| z-axis                                     | −0.15 (−0.28 to −0.01) | −0.26 (−0.35 to −0.18) | 0.1                  | −0.23 (−0.33 to −0.12) | −0.37 (−0.45 to −0.29) | 0.14 (0.00 to 0.28)   |                         | 0.1                  |
| Rotation (°)                               |                        |                        |                      |                        |                        |                       |                         |                      |
| x-axis                                     | −0.18 (−0.44 to 0.09)  | −0.09 (−0.29 to 0.11)  | 0.6                  | −0.19 (−0.46 to 0.07)  | −0.11 (−0.32 to 0.10)  | −0.09 (−0.43 to 0.26) |                         | 0.6                  |
| y-axis                                     | 0.90 (0.37 to 1.43)    | 1.34 (0.94 to 1.85)    | 0.2                  | 1.14 (0.73 to 1.54)    | 1.75 (1.27 to 2.24)    | −0.62 (−1.26 to 0.03) |                         | 0.1                  |
| z-axis                                     | 0.01 (−0.10 to 0.12)   | −0.04 (−0.10 to 0.02)  | 0.8                  | −0.14 (−0.27 to 0.00)  | −0.09 (−0.16 to −0.03) | −0.62 (−1.26 to 0.03) |                         | 0.6                  |
| Summed migration, median (CI)              |                        |                        |                      |                        |                        |                       |                         |                      |
| MTPM (mm) <sup>c</sup>                     | 1.73 (1.14 to 1.87)    | 1.67 (1.42 to 1.79)    | 0.9                  | 1.91 (1.52 to 2.07)    | 1.88 (1.61 to 2.03)    | –                     |                         | 0.8                  |
| Total translation (mm)                     | 1.01 (0.85 to 1.10)    | 1.10 (0.95 to 1.18)    | 0.4                  | 1.21 (1.01 to 1.31)    | 1.27 (1.09 to 1.36)    | –                     |                         | 0.7                  |
| Total rotation (°)                         | 1.51 (0.94 to 1.61)    | 1.58 (0.96 to 1.66)    | 0.8                  | 1.46 (0.93 to 1.59)    | 1.92 (1.13 to 2.09)    | –                     |                         | 0.2                  |
| Clinical outcome, mean (CI)                |                        |                        |                      |                        |                        |                       |                         |                      |
| Oxford Hip Score                           | 16.2 (11.5 – 20.9)     | 19.0 (15.5 – 22.4)     | 0.7                  | 17.0 (11.2 – 22.8)     | 19.9 (16.3 – 23.4)     |                       |                         | 1.0                  |
| Pain rest (VAS 1–10)                       | −2.7 (−4.0 to −1.4)    | −2.5 (−3.3 to −1.6)    | 0.4                  | −2.2 (−3.9 to −0.5)    | −2.4 (−3.3 to −1.5)    |                       |                         | 0.8                  |
| Pain activity (VAS 1–10)                   | −4.3 (−5.7 ot −2.9)    | −4.9 (−6.0 to −3.9)    | 0.6                  | −4.1 (−5.9 to −2.2)    | −4.9 (−5.9 to −3.9)    |                       |                         | 0.8                  |

<sup>a</sup> Two-sample Wilcoxon rank-sum (Mann–Whitney) test.

<sup>b</sup> Difference in 2-year follow-up by Student's t-test.

<sup>c</sup> MTPM: Maximum total point motion.

Table 5. Postoperative radiographic evaluation according to Barrack et al. (1992)

|               | Hi-Fatigue<br>(n = 25) | Palacos<br>(n = 26) |
|---------------|------------------------|---------------------|
| Cementation   |                        |                     |
| A             | 24                     | 15                  |
| B             | 1                      | 10                  |
| C             | 0                      | 1                   |
| D             | 0                      | 0                   |
| Stem position |                        |                     |
| Varus         | 2                      | 2                   |
| Neutral       | 23                     | 24                  |
| Valgus        | 0                      | 0                   |

Table 6. Intraoperative evaluation of bone cements

|                                                                | Hi-Fatigue<br>(n = 24) | Palacos<br>(n = 27) |
|----------------------------------------------------------------|------------------------|---------------------|
| Time (minutes) for surgery <sup>a</sup>                        | 83 (55–114)            | 82 (50–150)         |
| Temperature (°C) in theater <sup>a</sup>                       | 20 (18.3–21)           | 20 (19–21.5)        |
| Humidity (%) in theater <sup>a</sup>                           | 41 (17–72)             | 41 (19–78)          |
| Temperature (°) in storage <sup>a</sup>                        | 20 (17.5–21)           | 20 (18–21.4)        |
| Humidity (%) in storage <sup>a</sup>                           | 42 (24–72)             | 50 (26–71)          |
| Mixing of cement (mean min:s, CI)                              | 1:05 (0:57–1:13)       | 1:01 (0:53–1:09)    |
| Application of cement begins <sup>b</sup>                      | 2:23 (2:12–2:34)       | 2:16 (2:06–2:26)    |
| Insertion of femoral stem begins <sup>b</sup>                  | 04:05 (03:54–04:16)    | 03:49 (03:40–03:58) |
| Curing of cement <sup>b</sup>                                  | 13:43 (13:16–14:11)    | 11:35 (11:14–11:56) |
| Were there problems preparing the MixiGun? (yes/no)            | 0/25                   | 3/24                |
| User-friendliness for preparing MixiGun <sup>c</sup>           | 6 (2–9)                | 6 (2–9)             |
| Was the cement easy to mix? (yes/no)                           | 24/1                   | 23/2                |
| Force used for cement mixing <sup>c</sup>                      | 2 (1–7)                | 2 (2–8)             |
| Was the cement smooth after mixing? (yes/no) 24/0              | 26/1                   |                     |
| User-friendliness for mixing with MixiGun <sup>c</sup>         | 3 (2–8)                | 3 (2–8)             |
| Were there monomer smell problems? <sup>c</sup>                | 3 (1–8)                | 3 (1–8)             |
| Was the application ok (surgeon evaluation)? (yes/no)          | 23/1                   | 27/0                |
| Force used for application of mixing <sup>c</sup>              | 3 (1–7)                | 3 (1–7)             |
| Force used for insertion of femoral stem <sup>c</sup>          | 3 (2–5)                | 3 (3–8)             |
| Stickiness of the cement at time of application <sup>c</sup>   | 3 (2–7)                | 3 (1–7)             |
| Rubberyiness of the cement at time of application <sup>c</sup> | 3 (1–5)                | 3 (3–7)             |
| User-friendliness for MixiGun (OR nurse) <sup>c</sup>          | 5.5 (2–8)              | 5.5 (2–8)           |
| User-friendliness for MixiGun (surgeon) <sup>c</sup>           | 7 (2–9)                | 7 (2–9)             |

<sup>a</sup> Values are median (range)  
<sup>b</sup> Values are mean time in minutes:seconds (CI)  
<sup>c</sup> Range from 1 = least to 9 = most

Table 7. Correlation of storage/theater temperature and working times

|                              | Hi-Fatigue |         | Palacos |         |
|------------------------------|------------|---------|---------|---------|
|                              | Rho        | p-value | Rho     | p-value |
| Storage temperature          |            |         |         |         |
| Mixing                       | –0.22      | 0.3     | –0.20   | 0.4     |
| Application of cement begins | –0.14      | 0.5     | 0.16    | 0.4     |
| Application of stem begins   | –0.09      | 0.7     | –0.14   | 0.5     |
| Curing of cement             | –0.41      | 0.1     | 0.00    | 1.0     |
| Theater temperature          |            |         |         |         |
| Mixing                       | –0.10      | 0.7     | 0.03    | 0.9     |
| Application of cement begins | –0.13      | 0.6     | 0.24    | 0.3     |
| Application of stem begins   | 0.20       | 0.4     | –0.07   | 0.8     |
| Curing of cement             | –0.46      | 0.03    | –0.13   | 0.5     |
